# Supplementary material for: Engineering of Shikimate Pathway and Terminal Branch for Efficient Production of L-Tryptophan in Escherichia coli
Source: MDPI journal article supplement (doi:10.3390/ijms241411866), 2023-07-24
Supplement: s1 [file s1]

# ***International Journal of Molecular Sciences***

## **Engineering of Shikimate pathway and Terminal Branch for Efficient Production of L-tryptophan in *Escherichia coli***

**Shuai Liu, Bing-Bing wang, Jian-Zhong Xu\*, Wei-Guo Zhang\***

The Key Laboratory of Industrial Biotechnology, Ministry of Education, School of Biotechnology,  
Jiangnan University, 1800# Lihu Road, Wuxi 214122, China

\*Correspondence: xujianzhong@jiangnan.edu.cn (J.-Z.X.); zhangwg@jiangnan.edu.cn (W.-G.Z.);

Tel./Fax: +86-510-85329312 (W.-G.Z.)

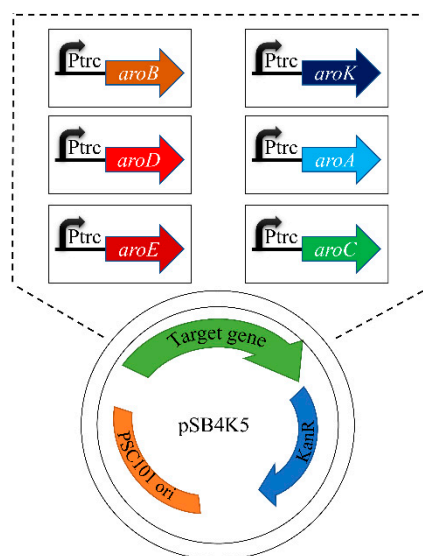

**Figure S1.** Schematic diagram of constructing plasmids (pSB4K5-aroB, pSB4K5-aroD, pSB4K5-aroE, pSB4K5-aroK, pSB4K5-aroA, and pSB4K5-aroC) for overexpressing shikimate pathway genes

**Table S1** Gradient elution program of HPLC for detection of L-trp, L-tyr, L-phe, and anthranilate.

| Time (min) | methanol (A) | 0.05% H <sub>3</sub> PO <sub>4</sub> (B) |
|------------|--------------|------------------------------------------|
| 0-3        | 2%           | 98%                                      |
| 3-22       | 2-80%        | 98-20%                                   |
| 22-25      | 2-80%        | 98-20%                                   |
| 25-26      | 80-2%        | 20-98%                                   |

an Inertsil ODS-SP column (250 mm × 4.6 mm i.d., 5 μm, GL Sciences, Japan) was used for gradient elution. The flow rate was set to 1 ml/min, and the detection wavelength was 210 nm.

**The base sequence of pSB4K5 is as follows :**

cgaagaaaggccacccgtgaaggtgagccagtgagttgattgctacgtaattagttagtagcccttagtgact  
cgaattcgcgccgctttagagcacaggccacagtaatacgactcactataggggtgtcatgtgtatgttgggg  
gatcccgactggcgagagccaggtaacgaatggatccccacatactttgttgatcccgaggattcggctcgt  
gtagctcattagctccgagccgagtcctcgaatacgagctgggcacagaagatatggcttcgtgccaggagg  
tgttcgcacttctcgtgttcgattgtgggatcaatcatggcaaatgcggccgaccagaatcatgcaagtgc  
gtaagatagtcgcgggtcgggtggtcgcaacttagcataacccgcggggcctcttcgggggtctcgcgggtt  
ttttgctgaaacggctgctaacaagcccgaagggaagctgagttggctgctgccaccgctgagcaataacta  
gcataaccccttggggcctctaaacgggtcttgaggggtttttgctgaaaggaggaaactacactgtctgcagga  
gtcactaagggttagttagttagattagcagaaagtcaaaagcctccgaccggaggctttgactaaaacttcctt  
tggggttatcattggggctcactcaaaggcggtaatcagataaaaaaatccttagctttcgctaaggatgatttc

tgctagtattattagaaaaactcatcgagcatcaaatagaaactgcaatttattcatatcaggattatcaataccatat  
ttttgaaaagccgttttctgtaatgaaggagaaaaactcaccgaggcagttccaaagaatggcaaggctcctggta  
acggctctgcgattccgacccgtccaacatcaatacaacctattaatttccctcgtcaaaaaataaggttatcaagt  
agaaatcacatgagtgacgactgaatccgggtgagaatggcaagagcttgtgcatttcttccagacttgttcaa  
caggccagccattacgctcgtcatcaaaaactcctcgcatcaaccaaaccgttattcatgcgtgattgagcctgagc  
aagacgaaatacacgatcgtgtttaaaggacaattacaaacaggaatcgaatgtaaccggcgaggaacac  
ggccagcgcatcaacaatatttccactgaatcaggatattcttctaatactggaaggctgtttccaggaatcg  
cgggtggtgagtaaccacgcatcatcaggagtacggataaaaatgcttgatgggtcgggagaggcataaactccgt  
cagccagttgagacggaccatctcatctgtaacatcattggcaacgctaccttggcatgttcagaaacaactctg  
gcgcacgaggcttccatacaagcgatagattgtcgcacctgattgcccacattatcgcgagcccatttataccc  
atataaatcagcgtccatgttggagttaaagcgcgaggagcaagacgttccggtgaatatggctcataac  
acccttgtattactgtttatgtaagcagacagtttattgttcatgatgatataattttatcttgtgcaatgtaacatca  
gagattttgagacacaacgtggcttgttgaataaatcgaacttttgcgtgagttgaaggatcagctctagtagttac  
attgtcgatctgttcatggtgaacagcttgaatgcacaaaaactcgtaaaagctctgatgtatctatctttttaca  
ccgttttcatctgtgcatatggacagtttcccttggatgtaacgggtgaacagttgttctacttttgtttagtctt  
gatgcttactgatagatacaagagccataagaacctcagatccttccgtatttagccagtatgttctctagtgtgg  
ttcgttgttttgcgtgagccatgagaacgaaccattgagatcatacttacttgcgtgctactcaaaaatttgcctc  
aaaactgggtgagctgaattttgcagttaaagcatcgtgtagtgttttcttagtccgttatgtaggtaggaatctga  
tgtaatgggtgttgggtatttgcaccattcattttatctgggtgttctcaagttcgggtacgagatccatttgcctatct  
agttcaacttggaaaatcaacgtatcagtcgggcgccctcgttatcaaccaccaatttcatattgctgtaagtgtt  
taaactcttacttattgggttcaaaaaccttgggttaagccttttaaaactcatggtagttatttcaagcattaacatga  
acttaaattcatcaaggctaattctctatattgccttgtgagtttcttttgtgttagttctttaaataaccactcataaat  
cctcatagagtatttgttttcaaaaagacttaacatgttccagattataattttatgaatttttaactggaaaagataag  
gcaatatcttccactaaaaactaattctaattttcgcttgagaactggcatagtttgcctactggaaaatcccaaa  
gccttaaccaaaaggattcctgatttccacagttctcgtcatcagctctctggttgccttagctaatacaccataagca  
tttccctactgatgttcatcatctgagcgtattgggtataagtgaacgataaccgtccgttcttccctttaggggtttc  
aatcgtgggggtgagtagtgccacacagcataaaaattagcttgggttcatgctccgttaagtcatagcgactaatc  
gtagttcatttgccttgaaaacaactaattcagacatacatctcaattgggtctaggtgattttaatcactataccaat  
tgagatgggctagtcattgataattacatgtccttttctttagttgtgggtatctgtaaaattctgtagaccttgc  
tggaacttgtaaattctgtagacctctgtaaaattcgctagaccttgtgtgttttttgtttatattcaagtgggt  
tataatttatagaataaagaaagaataaaaaaagataaaaagaatagatcccagccctgtgtataactcactact  
ttagtcagttccgcagtattacaaaaggatgtcgcaaacgctgttgcctcttcaaaaacagaccttaaaacccta  
aaggcttaagtagcacctcgcgaagctcgggcaaatcgtgaatattcctttgtctccgaccatcaggcacctga  
gtcgtgtcttttctgtgacattcagttcgtcgtcagggctctggcagtgaaatgggggtaaatggcactacag  
gcgcctttatggattcatgcaaggaaactaccataatacaagaaaagcccgacgggcttctcagggcggtttt  
atggcgggtctgctatgtggtgctatctgacttttgcgttcagcagttctgcctctgatttccagctctgaccac  
ttcggattatcccgtgacaggtcattcagactggctaattgcacccagtaaggcagcggtatcatcaacaggctta  
cccgtcttactgtccctagtgttggattctaccaataaaaaacgcccggcggaaccgagcgttctgaacaaat  
ccagatggagttctgaggtcattactggatctatcaacaggagtcgaagcgagctcgtaaacttgggtctgacagc  
tctagctccggcaaaaaaacgggcaagggtgtcaccacctgcccttttctttaaaccgaaaagattacttcgcg  
tttgcacctgacgtctaagaaaaggaatattcagcaatttgcctgtgc
